# Supplementary material for: High parity is associated with increased risk of cervical cancer: Systematic review and meta-analysis of case-control studies
Source: Research Square preprint supplement (doi:10.21203/rs.3.rs-397999/v1), 2021-04-08
Supplement: Supplementary file 1 [file a46723cc47d214620437511c.docx]

| **Articles** | **Reason of exclusion** |
| --- | --- |
| 1. Atalah E, Urteaga C, Rebolledo A, Villegas RA, Medina E, Csendes A: **Diet, smoking and reproductive history as risk factors for cervical cancer**. *Revista medica de Chile* 2001, **129**(6):597-603. | 1 |
| 1. Aziz MF: Gynecological cancer in Indonesia. Journal of gynecologic oncology 2009, 20(1):8-10. | 2 |
| 1. Baskaran K, Kumar PK, Santha K, Sivakamasundari I: **Cofactors and Their Association with Cancer of the Uterine Cervix in Women Infected with High-Risk Human Papillomavirus in South India**. Asian Pacific Journal of Cancer Prevention : APJCP 2019, 20(11):3415-3419. | 3 |
| 1. Bayo S, Bosch FX, de Sanjose S, Munoz N, Combita AL, Coursaget P, Diaz M, Dolo A, van den Brule AJ, Meijer CJ: **Risk factors of invasive cervical cancer in Mali.** Int J Epidemiol 2002, 31(1):202-209. | 4 |
| 1. Berraho M, Amarti-Riffi A, El-Mzibri M, Bezad R, Benjaafar N, Benideer A, et al. **HPV and cofactors for invasive cervical cancer in Morocco: a multicentre case-control study.** BMC cancer. 2017;17(1):435-9. | 4 |
| 1. Bhojani KR, Garg R. **Cytopathological study of cervical smears and correlation of findings with risk factors**. Int J Biol Med Res. 2011 2011;2(3):757-61. | 5 |
| 1. Crauciuc E, Toma O, Crauciuc D, Iancu D. **The cervical cancer and its obstetrical antecedents. Analele Ştiinţifice Ale Universităţii Alexandru Ioan Cuza din Iași,Sectiunea II A : Genetica si Biologie Moleculara**. 2011;12(2). | 5 |
| 1. Delgado-Enciso I, Martinez-Garza SG, Rojas-Martinez A, Espinoza-Gomez F, Canseco-Avila LM, Vidal-Gutierrez O, et al. [**The effect of MTHFR polymorphisms, pregnancy and first intercourse on cervical cancer in a population from the Northeastern Mexico]**. Rev Invest Clin. 2006 Sep-Oct; 58(5):462-9. | 1 |
| 1. Luhn P, Walker J, Schiffman M, Zuna RE, Dunn ST, Gold MA, et al. **The role of co-factors in the progression from human papillomavirus infection to cervical cancer**. Gynecol Oncol. 2013 Feb;128(2):265-70. | 5 |
| 1. Matos A, Moutinho J, Pinto D, Medeiros R: **The influence of smoking and other cofactors on the time to onset to cervical cancer in a southern European population**. Eur J Cancer Prev 2005, 14(5):485-491. | 3 |
| 1. Paramita S, Soewarto S, Widodo MAA, Sumitro SB. **High parity and hormonal contraception use as risk factors for cervical cancer in East Kalimantan**. Medical Journal of Indonesia. 2010;19(4):268-72. | 4 |
| 1. Pereira CRN, Rosa MLG, Vasconcelos GALBM, Faria PCP, Cavalcanti SMB, Oliveira LHS: **Human papillomavirus prevalence and predictors for cervical cancer among high-risk women from Rio de Janeiro, Brazil**. International Journal of Gynecologic Cancer 2007, 17(3):651-660. | 3 |
| 1. Thulaseedharan JV, Malila N, Hakama M, Esmy PO, Cherian M, Swaminathan R, et al. **Effect of screening on the risk estimates of socio demographic factors on cervical cancer - a large cohort study from rural India**. Asian Pac J Cancer Prev. 2013;14(1):589- | 5 |

**Reasons of exclusion**: **1**. full article reported in language other than English; **2**. full text not available;

**3**. Outcome of interest is not reported separately; **4**. Outcome of interest is not reported; 5. Excluded after critical appraisal
