# Supplementary material for: High parity is associated with increased risk of cervical cancer: Systematic review and meta-analysis of case-control studies
Source: Research Square preprint supplement (doi:10.21203/rs.3.rs-397999/v1), 2021-04-08
Supplement: Supplementary file 2 [file fc7d04a243fb9573255175bc.xlsx]

## Sheet: risk of bias included artc only
S.N	Study ID	Comparability of cases and control	Matching	similarity of criteria	Measurement of exposure	Identification of confounder	Dealing with confounder	Assessment of outcome	Exposure period	Statistical Analysis	Over all assessment	Final Disposition
1	Adjorlolo-Johnson, 2010	yes	yes	yes	yes	yes	yes	yes	yes	yes	low risk	include
2	Arfailasufandi, 2019	yes	yes	yes	yes	yes	yes	yes	yes	yes	low risk	include
3	Bezabih, 2015	yes	yes	yes	yes	yes	yes	yes	yes	yes	low risk	include
4	Cai, 2008	yes	yes	yes	yes	yes	yes	yes	yes	yes	low risk	include
5	chen, 2005	yes	yes	yes	yes	yes	yes	yes	yes	yes	low risk	include
6	Franceschi, 2003	yes	yes	yes	yes	yes	yes	yes	yes	yes	low risk	include
7	Green, 2003	yes	yes	yes	yes	yes	yes	yes	yes	yes	low risk	include
8	Natphopsuk, 2012	yes	yes	yes	yes	yes	yes	yes	yes	yes	low risk	include
9	Nesrin, 2011	yes	yes	yes	yes	yes	yes	yes	yes	yes	low risk	include
10	putri, 2019	yes	yes	yes	yes	yes	yes	unclear	yes	yes	low risk	include
11	Sharma, 2018	yes	yes	yes	yes	yes	yes	yes	yes	yes	low risk	include
12	Shields, 2004	yes	yes	yes	yes	yes	yes	yes	yes	yes	low risk	include
13	Thakur, 2015	yes	yes	yes	yes	yes	yes	yes	yes	yes	low risk	include
	Risk of bias assessment tool. Yes (low risk); No (high risk); Unclear(high rik)
	1. Were the groups comparable other than the presence of disease in cases or the absence of disease in controls?
	2. Were cases and controls matched appropriately?
	3. Were the same criteria used for identification of cases and controls?
	4. Was exposure measured in a standard, valid and reliable way?
	5. Was exposure measured in the same way for cases and controls?
	6. Were confounding factors identified?
	7. Were strategies to deal with confounding factors stated?
	8. Were outcomes assessed in a standard, valid and reliable way for cases and controls?
	9. Was the exposure period of interest long enough to be meaningful?
	10. Was appropriate statistical analysis used?
	The overall risk of bias was then scored according to the number of high risk of bias per study: low (≤2), moderate (3–4), and high (≥5).

## Sheet: risk of bias
		Table: Risk of bias assessment of included articles using the Joanna Briggs Institute's Critical Appraisal tool
S.NO	S.N	Study ID	Comparability of cases and control	Matching	similarity of criteria	Measurement of exposure	Identification of confounder	Dealing with confounder	Assessment of outcome	Exposure period	Statistical Analysis	Over all assessment	Final Disposition	reasons of exclusion	delphi
1	1	Adjorlolo-Johnson, 2010	yes	yes	yes	yes	yes	yes	yes	yes	yes	low risk	include
2	2	Arfailasufandi, 2019	yes	yes	yes	yes	yes	yes	yes	yes	yes	low risk	include
3	3	Atalah, 2001	unclear	unclear	unclear	unclear	unclear	unclear	unclear	unlcear	unclear	unclear	exclude	Not reported in English
4	4	Aziz, 2009	unclear	unclear	unclear	unclear	unclear	unclear	unclear	unlcear	unclear	unclear	exclude	Full text in-accesible
5	5	Baskaran, 2019	no	no	no	yes	no	no	no	yes	no	high risk	exclude	Mixed cancer and Lesions as outcome
6	6	Bayo, 2002	yes	yes	yes	yes	yes	yes	yes	yes	yes	low risk	excude	There is no parity data
7	7	Berraho, 2017	yes	yes	yes	yes	yes	yes	yes	yes	yes	low risk	exclude	There is no parity data
8	8	Bezabih, 2015	yes	yes	yes	yes	yes	yes	yes	yes	yes	low risk	include
9	9	Bhojani, 2011	yes	no	no	no	no	no	yes	yes	no	high risk	exclude	No control group
10	10	Cai, 2008	yes	yes	yes	yes	yes	yes	yes	yes	yes	low risk	include
11	11	chen, 2005	yes	yes	yes	yes	yes	yes	yes	yes	yes	low risk	include
12	12	Crauciuc, 2011	N/A	N/A	N/A	N/A	no	no	no	yes	no	high risk	exclude	No comparison group
13	13	Delgado-Enciso, 2006	unclear	unclear	unclear	unclear	unclear	unclear	unclear	unlcear	unclear	unclear	exclude	Not reported in English
14	14	Franceschi, 2003	yes	yes	yes	yes	yes	yes	yes	yes	yes	low risk	include
15	15	Green, 2003	yes	yes	yes	yes	yes	yes	yes	yes	yes	low risk	include
16	16	Luhn, 2012	unclear	unclear	unclear	unclear	unclear	no	unclear	unlcear	unclear	high risk	exclude	Unclear method
17	17	Matos, 2005											exclude	Mixed cancer and Lesions as outcome
18	18	Natphopsuk, 2012	yes	yes	yes	yes	yes	yes	yes	yes	yes	low risk	include
19	19	Nesrin, 2011	yes	yes	yes	yes	yes	yes	yes	yes	yes	low risk	include
20	20	Paramita, 2010	yes	yes	yes	yes	yes	yes	no	yes	yes	low risk	exclude	Mixed cancer and Lesions as outcome
21	21	pereira, 2007	yes	yes	yes	yes	yes	yes	no	yes	yes	low risk	exclude	Mixed cancer and Lesions as outcome
22	22	putri, 2019	yes	yes	yes	yes	yes	yes	unclear	yes	yes	low risk	include
23	23	Sharma, 2018	yes	yes	yes	yes	yes	yes	yes	yes	yes	low risk	include
24	24	Shields, 2004	yes	yes	yes	yes	yes	yes	yes	yes	yes	low risk	include	Multicenter??
25	25	Thakur, 2015	yes	yes	yes	yes	yes	yes	yes	yes	yes	low risk	include	parity continously managed
26	26	Thulaseedharan, 2012											exclude	cohort; only preganavy asessed;	outcome not r
		Risk of bias assessment tool. Yes (low risk); No (high risk); Unclear(high rik)
		1. Were the groups comparable other than the presence of disease in cases or the absence of disease in controls?
		2. Were cases and controls matched appropriately?
		3. Were the same criteria used for identification of cases and controls?
		4. Was exposure measured in a standard, valid and reliable way?
		5. Was exposure measured in the same way for cases and controls?
		6. Were confounding factors identified?
		7. Were strategies to deal with confounding factors stated?
		8. Were outcomes assessed in a standard, valid and reliable way for cases and controls?
		9. Was the exposure period of interest long enough to be meaningful?
		10. Was appropriate statistical analysis used?
		The overall risk of bias was then scored according to the number of high risk of bias per study: low (≤2), moderate (3–4), and high (≥5).

## Sheet: Sheet2
	Table: Risk of bias assessment of included articles using the Joanna Briggs Institute's Critical Appraisal tool
S.NO	Study ID	Comparability of cases and control	Matching	similarity of criteria	Measurement of exposure	Identification of confounder	Dealing with confounder	Assessment of outcome	Exposure period	Statistical Analysis	Over all assessment	Final Disposition	Remark	delphi
1	Adjorlolo-Johnson, 2010	yes	yes	yes	yes	yes	yes	yes	yes	yes	low risk	include
2	Anglade, 2018	unclear	unclear	unclear	unclear	unclear	unclear	unclear	unlcear	unclear	unclear	exclude	full text unavailable	t/a
3	Arfailasufandi, 2019	yes	yes	yes	yes	yes	yes	yes	yes	yes	low risk	include
4	Atalah, 2001											exclude	not English
5	Aziz, 2009	unclear	unclear	unclear	unclear	unclear	unclear	unclear	unlcear	unclear	unclear	exclude	summary only; request full text
6	Baskaran, 2019	no	no	no	yes	no	no	no	yes	no	high risk	exclude	mixed cancer and Lesions as outcome
7	Bayo, 2002	yes	yes	yes	yes	yes	yes	yes	yes	yes	low risk	excude	there is no parity data; adjusted for parity
8	Berraho, 2017	yes	yes	yes	yes	yes	yes	yes	yes	yes	low risk	exclude	no parity data; contact authors; gravidity
9	Bezabih, 2015	yes	yes	yes	yes	yes	yes	yes	yes	yes	low risk	include
10	Bhojani, 2011	yes	no	no	no	no	no	yes	yes	no	high risk	exclude	not conducted regression;	no control group
11	Cai, 2008	yes	yes	yes	yes	yes	yes	yes	yes	yes	low risk	include
12	chen, 2005	yes	yes	yes	yes	yes	yes	yes	yes	yes	low risk	include
13	Crauciuc, 2011	N/A	N/A	N/A	N/A	no	no	no	yes	no	high risk	exclude	no comparison group; only cancer cases analyzed
14	Delgado-Enciso, 2006											exclude	not English
15	Franceschi, 2003	yes	yes	yes	yes	yes	yes	yes	yes	yes	low risk	include
16	Green, 2003	yes	yes	yes	yes	yes	yes	yes	yes	yes	low risk	include
17	Hinkula, 2004											exclude	EXCLUDE AT TTLE AND ABSTRACT PHASE	t/a
18	Liao, 2012											exclude	cohort; used causal pie analysis; better for discussion	t/a
19	Luhn, 2012	unclear	unclear	unclear	unclear	unclear	no	unclear	unlcear	unclear	high risk	EXCLUDE
20	Makuza, 2015	N/A	no	n/a	yes	no	yes	yes	no	yes		exclude	cross-sectional	t/a
21	Matos, 2005											exclude	cervical lesion and cancer mixed
22	Mogren, 2001	n/a										exclude	cohort; exclude	t/a
23	Muwonge, 2016											exclude	cross-sectional/Delphi needed??	t/a
24	Natphopsuk, 2012	yes	yes	yes	yes	yes	yes	yes	yes	yes	low risk	include
25	Nesrin, 2011	yes	yes	yes	yes	yes	yes	yes	yes	yes	low risk	include	operationalized parity as preg >6month regardless of outcome
26	Paramita, 2010	yes	yes	yes	yes	yes	yes	yes	yes	yes	low risk	exclude	cases were both CIN and cancer mixed
27	pereira, 2007	yes	yes	yes	yes	yes	yes	no	yes	yes		exclude	mixed cancer and Lesions as outcome
28	putri, 2019	yes	yes	yes	yes	yes	yes	unclear	yes	yes		include	self admonistered, outcome measuremment not mentioned
29	Sharma, 2018	yes	yes	yes	yes	yes	yes	yes	yes	yes	low risk	include
30	Shields, 2004	yes	yes	yes	yes	yes	yes	yes	yes	yes	low risk	include	multicenter??
31	Thakur, 2015	yes	yes	yes	yes	yes	yes	yes	yes	yes	low risk	include	parity continously managed
32	Thulaseedharan, 2012											exclude	cohort; only preganavy asessed;	outcome not r
	Risk of bias assessment tool. Yes (low risk); No (high risk); Unclear(high rik)
	1. Were the groups comparable other than the presence of disease in cases or the absence of disease in controls?
	2. Were cases and controls matched appropriately?
	3. Were the same criteria used for identification of cases and controls?
	4. Was exposure measured in a standard, valid and reliable way?
	5. Was exposure measured in the same way for cases and controls?
	6. Were confounding factors identified?
	7. Were strategies to deal with confounding factors stated?
	8. Were outcomes assessed in a standard, valid and reliable way for cases and controls?
	9. Was the exposure period of interest long enough to be meaningful?
	10. Was appropriate statistical analysis used?
	The overall risk of bias was then scored according to the number of high risk of bias per study: low (≤2), moderate (3–4), and high (≥5).

## Sheet: Sheet3
Articles	Reason of exclusion
Atalah E, Urteaga C, Rebolledo A, Villegas RA, Medina E, Csendes A: Diet, smoking and reproductive history as risk factors for cervical cancer. Revista medica de Chile 2001, 129(6):597-603.	1
Aziz MF: Gynecological cancer in Indonesia. Journal of gynecologic oncology 2009, 20(1):8-10.	2
Baskaran K, Kumar PK, Santha K, Sivakamasundari I: Cofactors and Their Association with Cancer of the Uterine Cervix in Women Infected with High-Risk Human Papillomavirus in South India. Asian Pacific Journal of Cancer Prevention : APJCP 2019, 20(11):3415-3419.	3
Bayo S, Bosch FX, de Sanjose S, Munoz N, Combita AL, Coursaget P, Diaz M, Dolo A, van den Brule AJ, Meijer CJ: Risk factors of invasive cervical cancer in Mali. Int J Epidemiol 2002, 31(1):202-209.	4
Berraho M, Amarti-Riffi A, El-Mzibri M, Bezad R, Benjaafar N, Benideer A, Matar N, Qmichou Z, Abda N, Attaleb M: HPV and cofactors for invasive cervical cancer in Morocco: a multicentre case-control study. BMC cancer 2017, 17(1):435.	4
Bezabih M, Tessema F, Sengi H, Deribew A: Risk Factors Associated with Invasive Cervical Carcinoma among Women Attending Jimma University Specialized Hospital, Southwest Ethiopia: A Case Control Study. Ethiop J Health Sci 2015, 25(4):345-352.	4
Matos A, Moutinho J, Pinto D, Medeiros R: The influence of smoking and other cofactors on the time to onset to cervical cancer in a southern European population. Eur J Cancer Prev 2005, 14(5):485-491.	3
Muwonge R, Ngo Mbus L, Ngoma T, Gombe Mbalawa C, Dolo A, da Ganda Manuel M, Nouhou H, Nacoulma M, Mwaiselage J, Koulibaly M et al: Socio-demographic and reproductive determinants of cervical neoplasia in seven sub-Sahara African countries. Cancer Causes Control 2016, 27(12):1437-1446.	4
Pereira CRN, Rosa MLG, Vasconcelos GALBM, Faria PCP, Cavalcanti SMB, Oliveira LHS: Human papillomavirus prevalence and predictors for cervical cancer among high-risk women from Rio de Janeiro, Brazil. International Journal of Gynecologic Cancer 2007, 17(3):651-660.	3
Anglade F: Cervical Cancer in Haiti, a Major Public Health Problem: A Retrospective and Descriptive Study on Cervical Cancer Biopsies Carried Out in the Capital’s Laboratories From 2013 to 2015. American Journal of Clinical Pathology 2018, 150(suppl_1):S90-S91.	2
1. full article is reported in other language than English
2. full text not available
3. Outcome of interest is not reported separately
4. Outcome of interest is not reported
